# Supplementary material for: Natural Repellents as a Method of Preventing Ant Damage to Microirrigation Systems
Source: MDPI journal article supplement (doi:10.3390/insects13040395), 2022-04-18
Supplement: s1 [file s1]

**Table S1.** List of compounds selected as potential repellents to be incorporated into polyethylene SDI tubes, including information on their main features and their reported effect on ants.

| Compound                                      | Features                                                                                                                                                        | Effect on ants/other insects                                                                                                                                                                                              | References                                                |
|-----------------------------------------------|-----------------------------------------------------------------------------------------------------------------------------------------------------------------|---------------------------------------------------------------------------------------------------------------------------------------------------------------------------------------------------------------------------|-----------------------------------------------------------|
| <b>Ethyl anthranilate</b>                     | ABIR (anthranilate-based insect repellent); cheap, nontoxic and widely used as an additive in food and cosmetics industries                                     | Demonstrated promising repellent activity against head lice and different species of mosquitoes. In extremely low concentrations, it also prevented red imported fire ant (RIFA: <i>Solenopsis invicta</i> Buren) nesting | Kain et al. [31]<br>Islam et al. [32]<br>Chen et al. [33] |
| <b>Eucalyptol (1,8-cineol)</b>                | Main constituent (ca. 90%) of the eucalyptus essential oil; aromatic and medicinal properties                                                                   | Showed a complete repellent effect on RIFA feeding activity, preventing attacks on <i>Tenebrio molitor</i> L. larvae sprayed with eucalyptus oil and reducing climbing and feeding activity in sprayed ants               | Wang et al. [34]                                          |
| <b>p-anisaldehyde (4-methoxybenzaldehyde)</b> | Floral volatile present in different plant species; main component of the floral bouquet of male flowers of <i>Petasites fragans</i>                            | Exhibited repellent effect on <i>Formica aquilonia</i> (Yarrow) in olfactory tests. Strongly attractive to pollinators                                                                                                    | Theis et al. [35]<br>Pattrick et al. [36]                 |
| <b>Cinnamon essential oil</b>                 | Extracted from the bark or the leaves of different <i>Cinnamomum</i> species; commonly used in food and chemical industries due to its aroma                    | Both essential oil and leaves of indigenous cinnamon ( <i>C. osmophloemum</i> ) showed an excellent inhibitory effect that controls RIFA                                                                                  | Cheng et al. [37]<br>Huang et al. [38]                    |
| <b>Citronella essential oil</b>               | Extracted from the Poaceae <i>Cymbopogon nardus</i> and <i>Cymbopogon winterianus</i> , few toxic to mammals and extensively commercialized as insect repellent | Prevented movement of RIFA and the Argentine ant ( <i>Linepithema humile</i> (Mayr)); in high doses, it caused significant ant mortality of both species                                                                  | Wiltz et al. [39]                                         |
| <b>Permethrin</b>                             | Odorless and biodegradable synthetic pyrethroid insecticide, derived from the plant <i>Chrysanthemum cinerariifolium</i>                                        | At very low doses, it caused aversion in a great variety of arthropods                                                                                                                                                    | Islam et al. [42]                                         |
